# Supplementary material for: Plasticity in Intrinsic Excitability of Hypothalamic Magnocellular Neurosecretory Neurons in Late-Pregnant and Lactating Rats
Source: Int J Mol Sci. 2021 Jul 1;22(13):7140. doi: 10.3390/ijms22137140 (PMC8268815; doi:10.3390/ijms22137140)
Supplement: Supplementary file 1 [file ijms-22-07140-s001.zip › ijms-1265305-supplementary.pdf]

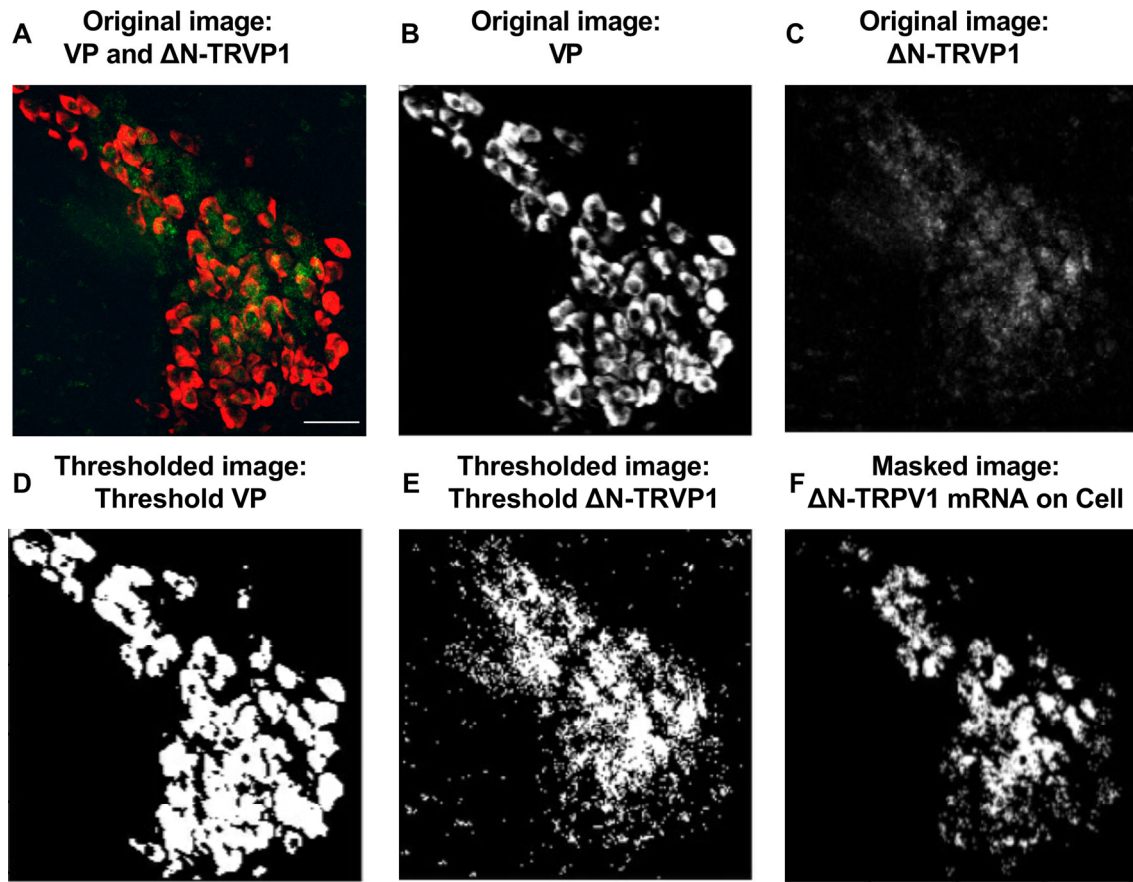

**Supplementary Figure S1. Example of the analysis of vasopressin mRNA and  $\Delta$ N-TRPV1 mRNA expression in the supraoptic nucleus of non-pregnant and late-pregnant rats.** **A.** Example micrograph of vasopressin mRNA and  $\Delta$ N-TRPV1 mRNA labelling in the supraoptic nucleus as shown in Figure 8B, generated by compression of Z-stacks using ImageJ Fiji Z-projection Max intensity. **B and C.** Images generated by splitting the image in panel A into the vasopressin mRNA channel (B) and  $\Delta$ N-TRPV1 mRNA channel (C). **D and E.** Thresholded images for vasopressin mRNA expression from panel B and  $\Delta$ N-TRPV1 mRNA from panel C, generated using Cell Profiler™. **F.** Masked image created by overlaying the two thresholded images in panels D and E, showing only pixels that were co-labelled for vasopressin mRNA and  $\Delta$ N-TRPV1 mRNA. Note that vasopressin mRNA labelling did not allow differentiation between the borders of individual cells in all sections. Therefore, it was not possible to quantify of numbers of  $\Delta$ N-TRPV1 mRNA-positive vasopressin neurons.

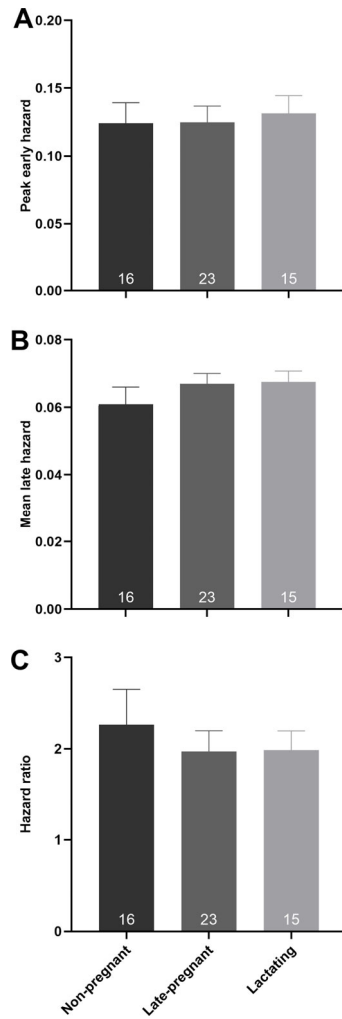

**Supplementary Figure S2. A – C.** Mean ( $\pm$  SEM) peak early hazard (A), mean late hazard (B) and peak early:mean late hazard ratio (C) of phasic vasopressin neurons in non-pregnant, late-pregnant and lactating rats. There was no effect of reproductive status on the peak early hazard ( $H = 0.17$ ,  $P = 0.92$ , one-way ANOVA on ranks), mean late hazard ( $H = 4.27$ ,  $P = 0.12$ ) or hazard ratio ( $H = 0.41$ ,  $P = 0.82$ ) of phasic vasopressin neurons in non-pregnant, late-pregnant and lactating rats.

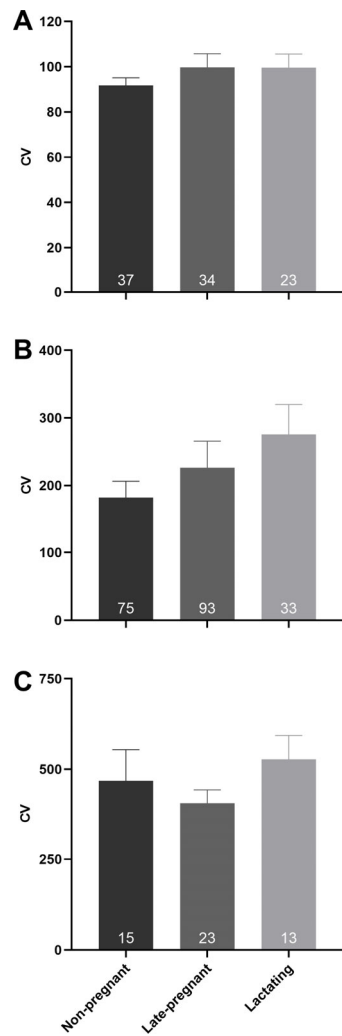

**Supplementary Figure S3. A – C.** Mean ( $\pm$  SEM) coefficient of variation of inter-spike interval of oxytocin neurons (A), vasopressin neurons (B) and phasic vasopressin (C) neurons. There was no effect of reproductive status on the CV of oxytocin neurons ( $H = 0.76$ ,  $P = 0.69$ , one-way ANOVA on ranks), vasopressin neurons ( $H = 5.43$ ,  $P = 0.07$ ), or phasic vasopressin neurons ( $H = 2.73$ ,  $P = 0.25$ ).
